# Supplementary material
Source: PubMed Central journal article supplement (PMC3416553)
Supplement: JB.06709-11_zjb999091698so1.pdf [file JB.06709-11_zjb999091698so1.pdf]

**Table S1. Coding regions bound by Rgg in the exponential phase of growth.**

| Category & Spy49 no. <sup>a</sup> | Gene <sup>b</sup> | Description                                   | ChIP-chip fold enrichment <sup>c</sup> | Transcript fold change ( <i>rgg</i> /wt) <sup>d</sup> |
|-----------------------------------|-------------------|-----------------------------------------------|----------------------------------------|-------------------------------------------------------|
| <b>Synthesis</b>                  |                   |                                               |                                        |                                                       |
| 1132                              | <i>deaD1</i>      | ATP-dependent RNA helicase                    | 2.65                                   | -2                                                    |
| 14                                | (-)               | amino acid permease                           | 2.55                                   | -2                                                    |
| 1788                              | <i>dnaC</i>       | replicative DNA helicase                      | 2.51                                   | -                                                     |
| 60                                | <i>rpsN.1</i>     | small subunit ribosomal protein S14 (S29e)    | 2.48                                   | -2                                                    |
| 536                               | <i>prfB</i>       | peptide chain release factor 2                | 2.33                                   | -                                                     |
| 940                               | <i>citC</i>       | citrate (pro-3S)-lyase ligase                 | 2.31                                   | 2                                                     |
| 27                                | <i>purD</i>       | phosphoribosylamine--glycine ligase           | 2.22                                   | -2                                                    |
| <b>Metabolism</b>                 |                   |                                               |                                        |                                                       |
| 390                               | <i>pyrH</i>       | uridylate kinase                              | 2.92                                   | -                                                     |
| 1724                              | <i>hutU</i>       | urocanate hydratase                           | 2.90                                   | 4                                                     |
| 158                               | <i>araD</i>       | L-ribulose-5-phosphate 4-epimerase            | 2.67                                   | -5                                                    |
| 1413                              | <i>scrK</i>       | Fructokinase                                  | 2.64                                   | -2                                                    |
| 108                               | (-)               | deoxyadenosine kinase/deoxyguanosine kinase   | 2.49                                   | 2                                                     |
| 1369                              | <i>fabH</i>       | 3-oxoacyl-(acyl carrier protein) synthase III | 2.45                                   | -                                                     |
| 1621                              | <i>cdsA</i>       | phosphatidate cytidyltransferase              | 2.46                                   | 2                                                     |
| 788                               | (-)               | glycine reductase                             | 2.24                                   | -                                                     |
| 821                               | (-)               | 4-nitrophenyl phosphatase                     | 2.16                                   | -                                                     |
| 1282                              | <i>nadE</i>       | nicotinate phosphoribosyltransferase          | 2.14                                   | 2                                                     |
| 637                               | <i>gor</i>        | glutathione reductase                         | 2.13                                   | -2                                                    |
| 965                               | (-)               | trimethylamine dehydrogenase                  | 2.01                                   | 3                                                     |
| <b>Transport</b>                  |                   |                                               |                                        |                                                       |
| 1205                              | (-)               | thiol:disulfide interchange protein           | 3.45                                   | -                                                     |
| 579                               | (-)               | membrane protein                              | 2.21                                   | -                                                     |
| 590                               | (-)               | membrane protein                              | 2.05                                   | -                                                     |
| 969                               | (-)               | integral membrane protein                     | 2.04                                   | 2                                                     |
| 1098                              | (-)               | receptor protein kinase                       | 2.04                                   | -                                                     |

|                        |            |                                     |     |   |
|------------------------|------------|-------------------------------------|-----|---|
| <b>Repair</b><br>1160c | <i>phr</i> | deoxyribodipyrimidine<br>photolyase | 5.9 | 3 |
|------------------------|------------|-------------------------------------|-----|---|

---

<sup>a</sup> Genes are categorized based on KEGG genome annotations. Spy49 numbers are the open reading frames based on the *S. pyogenes* strain NZ131 genome annotation [23].

<sup>b</sup> A dash within parentheses indicates that the gene is not named.

<sup>c</sup> ChIP-chip fold enrichment was calculated as a ratio of signal intensity between the SA5 and *rgg* mutant strains.

<sup>d</sup> Fold change in the transcript level is from the current study and [16]. A dash indicates no change in the transcript level was observed.
